# Supplementary material
Source: publisher figshare collection journal article supplement (https://frontiersin.figshare.com/ndownloader/files/20311038)
Supplement: Supplementary file 1 [file 20311038]

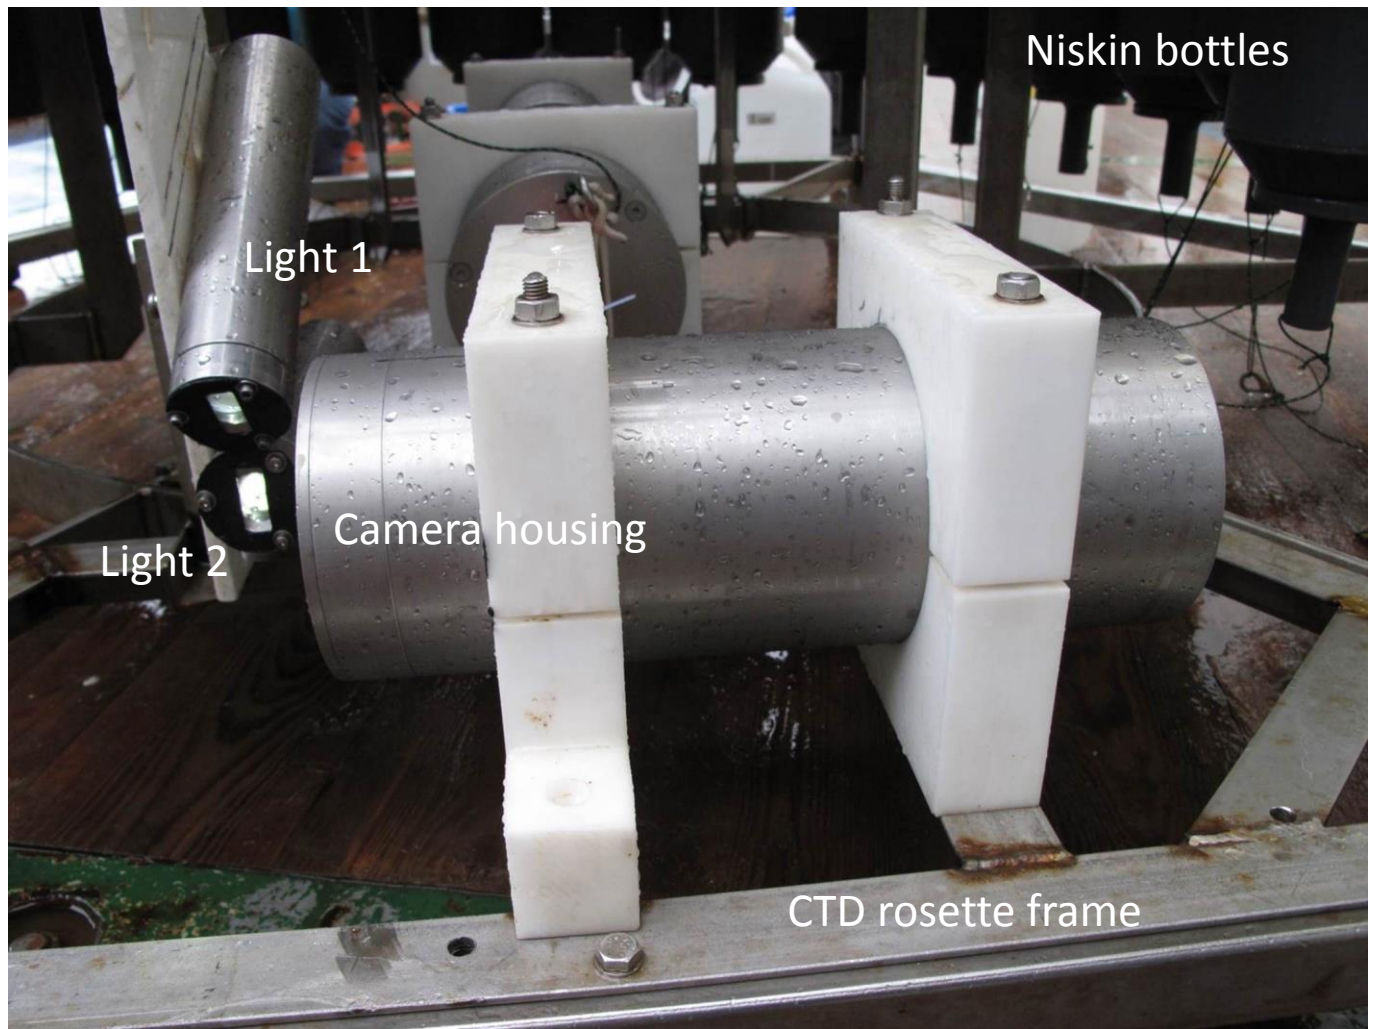

Supplementary figure 1. The video plankton profiler mounted to the CTD frame of the RV Pelagia during the Medea 2 expedition to the North Atlantic and Arctic Oceans.
